# Supplementary material for: Does ecophysiology mediate reptile responses to fire regimes? Evidence from Iberian lizards
Source: PeerJ. 2016 Jun 9;4:e2107. doi: 10.7717/peerj.2107 (PMC4906646; doi:10.7717/peerj.2107)
Supplement: Table S1 — Preferred temepratures measured and body mass measurements of individuals of the five lizard species used during lab experiments. The first excel folder include the raw data and the second one varialbe explanation. [file peerj-04-2107-s001.xls]

## Sheet: Data
SP	SITE	LATITUDE	LONGITUDE	ALTITUDE	CODE	SEX	SVL	WEIGHT	DATE_T	TP9	TP10	TP11	TP12	TP13	TP14	TP15	TP16	TP17	TP18	DATE_H	W7	W8	W9	W10	W11	W12	W13	W14	W15	W16	W17	W18	W19
Podarcis bocagei	Moledo	41.8368	-8.87433	10	Pb_1	M	60.54	4.2975	2010-07-25	32.9	32.9	31.5	30.9	24.3	27.8	28.2	33.1	31.4	32.1	2010-07-26	4.2975	4.2843	4.2773	4.2658	4.253	4.2416	4.2351	4.2284	4.2192	4.2107	4.2012	4.1916	4.1836
Podarcis bocagei	Moledo	41.8368	-8.87433	10	Pb_2	M	51.39	3.1863	2010-07-25	32.1	32.1	27.7	24.3	24.3	30.2	32.4	34.4	35.1	31.6	2010-07-26	3.1863	3.1654	3.1511	3.1361	3.1205	3.107	3.0955	3.0823	3.07	3.0549	3.0407	3.0274	3.0166
Podarcis bocagei	Moledo	41.8368	-8.87433	10	Pb_3	M	49.64	3.0647	2010-07-25	30.2	30.2	26.2	30.2	31.8	29.1	30.2	32.6	29.4	30.9	2010-07-26	3.0647	3.053	3.0465	3.0359	3.0285	3.0206	3.0126	3.0059	2.9988	2.9909	2.9833	2.9749	2.9688
Podarcis bocagei	Moledo	41.8368	-8.87433	10	Pb_4	M	55.13	3.9477	2010-07-25	33.4	33.4	31.9	29.9	29.1	30.2	32.7	28	28.6	29.1	2010-07-26	3.9477	3.9385	3.9341	3.9285	3.9111	3.8978	3.8912	3.8831	3.8762	3.8678	3.8619	3.8549	3.8522
Podarcis bocagei	Moledo	41.8368	-8.87433	10	Pb_5	M	50.86	3.0369	2010-07-25	32.4	32.4	26	23.5	25	30.3	30.3	31.2	30.2	33	2010-07-26	3.0369	3.0259	3.0202	3.0135	2.983	2.9679	2.9639	2.9586	2.9537	2.9487	2.9434	2.9398	2.9354
Podarcis bocagei	Moledo	41.8368	-8.87433	10	Pb_6	M	55.73	3.695	2010-07-27	33.7	33.2	29.2	30.5	30.9	29.8	29.9	31.4	31.7	32	2010-07-28	3.695	3.6876	3.6808	3.6783	3.6745	3.6571	3.619	3.604	3.5998	3.5944	3.5905	3.5873	3.5847
Podarcis bocagei	Moledo	41.8368	-8.87433	10	Pb_7	M	60.15	4.8491	2010-07-27	32.9	34.6	29.9	30.9	31.2	33.7	31.9	33.4	34.4	31.3	2010-07-28	4.8491	4.8402	4.8343	4.8322	4.8287	4.8249	4.798	4.766	4.7502	4.7359	4.7295	4.7253	4.7223
Podarcis bocagei	Moledo	41.8368	-8.87433	10	Pb_8	M	51.22	3.2675	2010-07-27	31.9	28.2	28.4	26.6	29.8	27.8	29.1	29.9	33.1	29.3	2010-07-28	3.2675	3.2565	3.2496	3.2469	3.2301	3.2121	3.2027	3.1928	3.1871	3.1801	3.1718	3.1651	3.1601
Podarcis bocagei	Moledo	41.8368	-8.87433	10	Pb_9	M	54.07	3.2748	2010-07-27	33.5	30.4	31.7	26	30.9	31.4	31.2	31.8	30.5	29.1	2010-07-28	3.2748	3.2636	3.2548	3.2475	3.2395	3.2342	3.2293	3.2227	3.2163	3.2082	3.2023	3.1933	3.189
Podarcis bocagei	Moledo	41.8368	-8.87433	10	Pb_10	M	51.91	3.2129	2010-07-27	34.4	33.4	31	30.9	31.6	32.4	32.5	34.2	33.5	31.4	2010-07-28	3.2129	3.2012	3.1951	3.192	3.1889	3.1848	3.1804	3.1722	3.1505	3.1368	3.1271	3.1217	3.1167
Podarcis guadarramae lusitanica	Moledo	41.8368	-8.87433	10	PhT1_1	M	52.14	2.9962	2010-07-24	31.8	30.9	30.5	29.9	32.4	30.7	31.1	31.8	33.6	31.7	2010-07-25	2.9962	2.9832	2.9778	2.9721	2.968	2.9643	2.9598	2.9239	2.9025	2.8932	2.8873	2.8832	2.8792
Podarcis guadarramae lusitanica	Moledo	41.8368	-8.87433	10	PhT1_2	M	56.01	3.3933	2010-07-24	31.8	29.4	27.1	34.8	33.1	30.9	31.2	32.4	34	33.6	2010-07-25	3.3933	3.3825	3.378	3.3722	3.3669	3.3625	3.3566	3.351	3.3452	3.3387	3.3295	3.3259	3.3236
Podarcis guadarramae lusitanica	Moledo	41.8368	-8.87433	10	PhT1_3	M	55.3	3.2767	2010-07-24	33.3	30.3	28	29.8	31.6	29.9	30.4	31.8	31.9	29.9	2010-07-25	3.2767	3.2657	3.2618	3.2596	3.2547	3.2529	3.2466	3.2419	3.2286	3.212	3.2041	3.2008	3.1936
Podarcis guadarramae lusitanica	Moledo	41.8368	-8.87433	10	PhT1_4	M	54.35	3.3004	2010-07-24	31.9	31.1	30.9	34.9	32.4	31.6	32.1	32.2	31.1	32.6	2010-07-25	3.3004	3.2914	3.2888	3.2838	3.2791	3.2742	3.272	3.2655	3.2624	3.2575	3.2518	3.2477	3.2472
Podarcis guadarramae lusitanica	Moledo	41.8368	-8.87433	10	PhT1_5	M	51.1	2.9981	2010-07-24	33.6	29.1	33.5	33	28.8	27	27.7	29.2	34.2	33.9	2010-07-25	2.9981	2.9883	2.9832	2.9785	2.9751	2.9711	2.9671	2.9437	2.9333	2.9267	2.9203	2.9159	2.9144
Podarcis guadarramae lusitanica	Moledo	41.8368	-8.87433	10	PhT1_6	M	54.81	2.722	2010-07-26	32.1	32.3	30.3	32.4	31.3	32.6	30.2	31.4	32.6	31.7	2010-07-27	2.722	2.7147	2.7105	2.7073	2.7055	2.7035	2.7006	2.6995	2.6974	2.6946	2.6915	2.6892	2.6804
Podarcis guadarramae lusitanica	Moledo	41.8368	-8.87433	10	PhT1_8	M	58.57	3.7809	2010-07-26	22.8	34.2	30.5	31.8	33.2	31.1	39.5	29.4	31.2	30	2010-07-27	3.7809	3.7701	3.766	3.76	3.7578	3.7541	3.75	3.7459	3.6962	3.6822	3.6733	3.6686	3.6653
Podarcis guadarramae lusitanica	Moledo	41.8368	-8.87433	10	PhT1_9	M	49.88	2.3594	2010-07-26	32.5	33.4	32.1	31.7	31.6	32.2	32.6	30.7	32	30.2	2010-07-27	2.3594	2.3527	2.3491	2.3471	2.343	2.3226	2.3072	2.2962	2.2897	2.2829	2.279	2.2759	2.273
Podarcis guadarramae lusitanica	Moledo	41.8368	-8.87433	10	PhT1_10	M	51.43	2.8423	2010-07-26	32.1	32.1	32.5	30.3	29.7	30.2	33.1	31.9	32	28.2	2010-07-27	2.8423	2.831	2.8267	2.8223	2.8179	2.8136	2.8067	2.8031	2.7998	2.7936	2.786	2.7763	2.7705
Psammodromus algirus	Nabainhos - Serra da Estrela	40.5133	-7.53406	683	T10	M	75	10.4262	2015-04-20	32.7	31.1	34.4	37.7	36.3	34.4	35.5	36	36.1	36.7	2015-04-21	10.4262	10.4044	10.3581	10.3463	10.3337	10.3206	10.3	10.2806	10.275	10.2661	10.2593	10.2544
Psammodromus algirus	Nabainhos - Serra da Estrela	40.5133	-7.53406	683	M12	M	80	15.1519	2015-04-20	34.4	34.5	32.9	36	33.4	33.7	35.1	37.5	36.2	37.8	2015-04-21	15.1519	15.1366	15.1247	15.1218	15.1106	15.0833	15.0425	15.0225	15.0116	15.005	14.9972	14.9909
Psammodromus algirus	Nabainhos - Serra da Estrela	40.5133	-7.53406	683	M6	M	77	14.5138	2015-04-20	31.1	33	33.5	36.7	37.8	36.2	35.9	37.9	36.9	35.8	2015-04-21	14.5138	14.4936	14.4857	14.4851	14.4768	14.4648	14.4477	14.4381	14.4314	14.4261	14.4188	14.4162
Psammodromus algirus	Nabainhos - Serra da Estrela	40.5133	-7.53406	683	A4	M	70	9.6941	2015-04-20	31.3	34.4	35	35.3	32.6	33.4	34.7	35.6	37.7	35.2	2015-04-21	9.6941	9.6834	9.6744	9.6713	9.6624	9.6555	9.6468	9.6426	9.637	9.6319	9.6259	9.6246
Psammodromus algirus	Nabainhos - Serra da Estrela	40.5133	-7.53406	683	T3	M	75	9.8682	2015-04-20	29	32.2	36.3	35.5	37.3	35.3	34.6	34.3	37.5	35.1	2015-04-21	9.8682	9.8559	9.8523	9.8511	9.8431	9.8222	9.7664	9.7387	9.7183	9.7116	9.7052	9.7039
Psammodromus algirus	Nabainhos - Serra da Estrela	40.5133	-7.53406	683	T13	M	68	7.3401	2015-04-20	32.3	34.4	33.6	31.7	36.3	34.9	34.4	37.1	38.2	36.3	2015-04-21	7.3401	7.3364	7.3281	7.3214	7.3143	7.304	7.2951	7.2835	7.2778	7.2768	7.2754	7.2731
Psammodromus algirus	Nabainhos - Serra da Estrela	40.5133	-7.53406	683	T5	M	77	13.1358	2015-04-20	33.1	34.6	33.4	34.2	34.6	35.2	35.1	37	37.4	33	2015-04-21	13.1358	13.1218	13.1106	13.1071	13.1041	13.0972	13.0958	13.0924	13.0798	13.0696	13.0657	13.0627
Psammodromus algirus	Nabainhos - Serra da Estrela	40.5133	-7.53406	683	M5	M	73	12.4512	2015-04-20	30.3	33.1	35	37.7	35.6	35.8	38.5	36.1	38.6	36.7	2015-04-21	12.4512	12.4467	12.4392	12.4382	12.4332	12.4212	12.4135	12.4083	12.4065	12.4037	12.3967	12.3955
Lacerta schriberi	Vairão	41.3291	-8.67276	100	L1	M	105.98	27.7547	2015-05-01	30.3	34.9	34.9	35.9	33.6	34.2	31.8	35.3	35.6	35	2015-05-02	27.7547	27.7197	27.6888	27.6542	27.6122	27.5213	27.4249	27.3508	27.2695	27.2061	27.1475	27.102
Lacerta schriberi	Vairão	41.3291	-8.67276	100	L2	M	99.86	23.8997	2015-05-01	30.3	28.9	31.8	30.4	35.3	31.8	28.7	36.4	36.5	32.8	2015-05-02	23.8997	23.8416	23.7971	23.7406	23.6502	23.5927	23.5247	23.4584	23.3868	23.3125	23.2395	23.1793
Lacerta schriberi	Vairão	41.3291	-8.67276	100	L3	M	99.47	25.2844	2015-05-01	28.3	33	36.2	33	36.1	36	32.6	34.2	34.3	33.8	2015-05-02	25.2844	25.2612	25.2379	25.2114	25.1779	25.1406	25.1052	25.0709	25.0327	24.9982	24.9622	24.9243
Lacerta schriberi	Vairão	41.3291	-8.67276	100	L4	M	111.45	31.996	2015-05-01	28.6	28.9	34.4	35.2	32.6	33.7	33.4	34.4	33	34.1	2015-05-02	31.996	31.9519	31.9151	31.8763	31.832	31.7896	31.7449	31.7058	31.6563	31.6156	31.5718	31.5309
Lacerta schriberi	Vairão	41.3291	-8.67276	100	L6	M	71.66	10.075	2015-05-08	33.4	32.2	32.4	31.8	34.7	33.3	33.6	33.8	33.6	33.2	2015-05-09	10.075	10.0612	10.0434	10.0301	10.0027	9.9844	9.9616	9.9246	9.8919	9.8715	9.8528	9.8352
Lacerta schriberi	Vairão	41.3291	-8.67276	100	L7	M	85.04	16.4979	2015-05-08	36.2	34.2	33.4	37.1	35.1	34.6	34.9	34.8	35	38	2015-05-09	16.4979	16.479	16.4599	16.4398	16.4071	16.3899	16.3668	16.3259	16.2847	16.261	16.2414	16.2222
Lacerta schriberi	Vairão	41.3291	-8.67276	100	L8	M	100.12	28.8905	2015-05-08	32	31.4	31.2	35.2	34.1	31.9	30.7	31.9	32.2	36.6	2015-05-09	28.8905	28.8528	28.8332	28.8157	28.7907	28.7728	28.7521	28.7084	28.6311	28.5827	28.5563	28.5332
Lacerta schriberi	Vairão	41.3291	-8.67276	100	L9	M	94.31	24.2063	2015-05-08	33.6	30.3	30.8	32.3	32	31.4	31.4	32.9	32.3	36.1	2015-05-09	24.2063	24.169	24.1502	24.1299	24.0918	24.0471	24.0149	23.9687	23.9378	23.9166	23.8941	23.8727
Timon lepidus ibericus	Vairão	41.3291	-8.67276	100	T1	M	131.66	55.8682	2015-05-01	19.4	32.5	35.2	34.5	29.7	31.4	32.6	33.2	32.3	32.6	2015-05-02	55.8682	55.8055	55.7696	55.7264	55.6759	55.632	55.5776	55.526	55.4647	55.4078	55.3551	55.3009
Timon lepidus ibericus	Vairão	41.3291	-8.67276	100	T2	M	134.58	59.2485	2015-05-01	30.7	25.6	26.3	27.4	38.4	34.6	35.1	34.4	35	36.2	2015-05-02	59.2485	59.1702	59.1159	59.0434	58.9571	58.8789	58.7948	58.7171	58.5835	58.4431	58.3249	58.2175
Timon lepidus ibericus	Vairão	41.3291	-8.67276	100	T3	M	147.01	85.7488	2015-05-01	33.4	32.8	34.2	32.1	33.3	32.7	33	33	35.3	34	2015-05-02	85.7488	85.6318	85.565	85.4899	85.3974	85.3144	85.2218	85.1369	85.0102	84.8746	84.7571	84.6438
Timon lepidus ibericus	Vairão	41.3291	-8.67276	100	T4	M	158.17	84.2016	2015-05-01	29.4	34.7	32.6	33.8	30.1	35.1	31.7	33.1	32.5	36.3	2015-05-02	84.2016	84.1078	84.0447	83.9715	83.8838	83.8059	83.7166	83.6293	83.5271	83.448	83.3721	83.3007
Timon lepidus ibericus	Vairão	41.3291	-8.67276	100	T5	M	136.08	62.2839	2015-05-01	33.3	33.4	33.5	34.7	30.1	32.1	31.3	34.5	33.6	33.2	2015-05-02	62.2839	62.233	62.1946	62.1191	61.9918	61.8342	61.6829	61.5778	61.4504	61.348	61.2662	61.2042
Timon lepidus ibericus	Vairão	41.3291	-8.67276	100	T6	M	136.79	71.2735	2015-05-01	33.8	33	33.7	33.7	33.1	34.9	31.4	32.7	33.7	32.8	2015-05-02	71.2735	71.1928	71.1591	71.1223	71.0776	71.0331	70.9883	70.9426	70.8917	70.8453	70.7967	70.7505

## Sheet: legends
variable	explanation
SP	species; eventually subspecies if evolutiorarily relevant
SITE	exact locality of collection (coordinates and altitude below)
LATITUDE
LONGITUDE
ALTITUDE
CODE	internal code for the experiments; in most cases there is a tissue sample associated in CIBIO database
SEX	only males are here; but there females and immature available formthe same localities in several cases
SVL	snout-vent length in mm
WEIGHT	body mass in g
DATE_T	date of the thermal grandient experiment
TP9	preferred temperature measuread at 9 h
TP10	preferred temperature measuread at 10 h
TP11	preferred temperature measuread at 11 h
TP12	preferred temperature measuread at 12 h
TP13	preferred temperature measuread at 13 h
TP14	preferred temperature measuread at 14 h
TP15	preferred temperature measuread at 15 h
TP16	preferred temperature measuread at 16 h
TP17	preferred temperature measuread at 17 h
TP18	preferred temperature measuread at 18 h
DATE_H	date of the water loss experiment
W7	weight measured at 7 h
W8	weight measured at 8 h
W9	weight measured at 9 h
W10	weight measured at 10 h
W11	weight measured at 11 h
W12	weight measured at 12 h
W13	weight measured at 13 h
W14	weight measured at 14 h
W15	weight measured at 15 h
W16	weight measured at 16 h
W17	weight measured at 17 h
W18	weight measured at 18 h
W19	weight measured at 19 h
